# Supplementary material for: Tumor-immune profiling of CT-26 and Colon 26 syngeneic mouse models reveals mechanism of anti-PD-1 response
Source: PubMed Central journal article supplement (PMC8590766; doi:10.1186/s12885-021-08974-3), 2021-11-13
Supplement: 12885_2021_8974_MOESM1_ESM.pdf [file 12885_2021_8974_MOESM1_ESM.pdf]

## CT-26

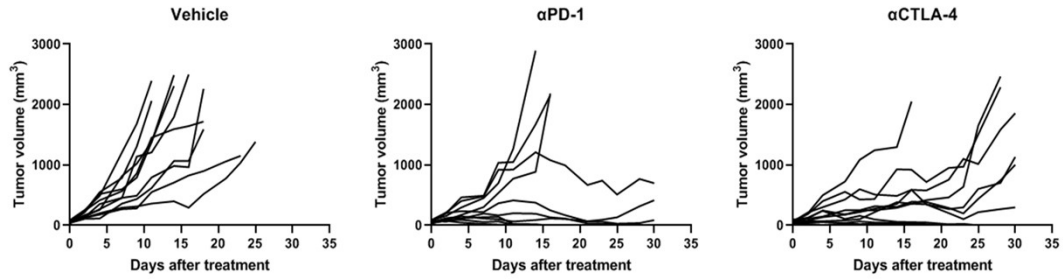

## Colon 26

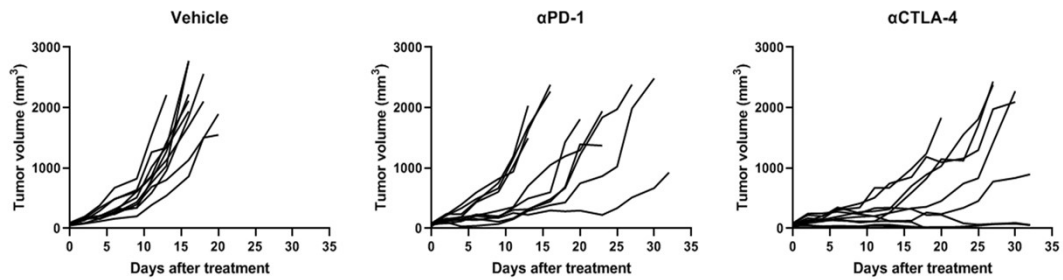

**Figure S1. Different sensitivities to anti-PD-1 and anti-CTLA-4 checkpoint blockades in CT-26 and Colon 26 tumor-bearing mice**

Spider plots of CT-26 and Colon 26 tumor volume for individual mice treated with vehicle (PBS), anti-PD-1 mAbs and anti-CTLA-4 mAbs
