# Supplementary material for: Tumor-immune profiling of CT-26 and Colon 26 syngeneic mouse models reveals mechanism of anti-PD-1 response
Source: PubMed Central journal article supplement (PMC8590766; doi:10.1186/s12885-021-08974-3), 2021-11-13
Supplement: 12885_2021_8974_MOESM2_ESM.pdf [file 12885_2021_8974_MOESM2_ESM.pdf]

# A

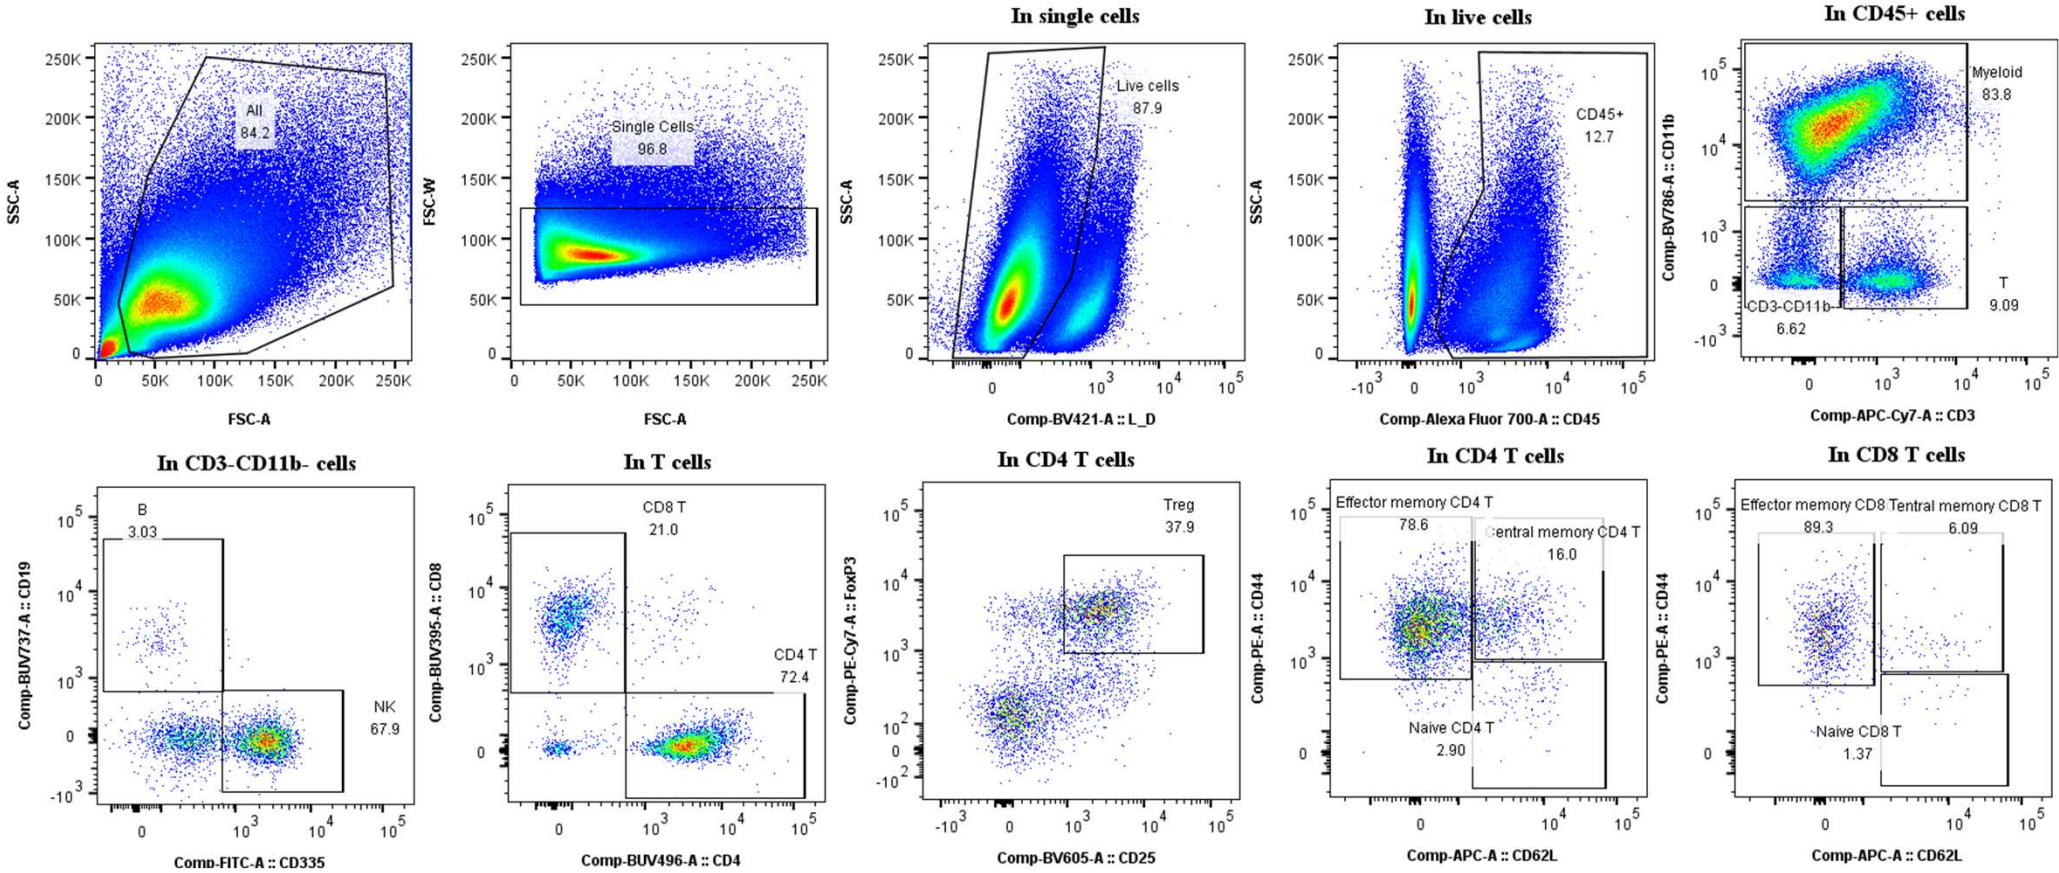

**B**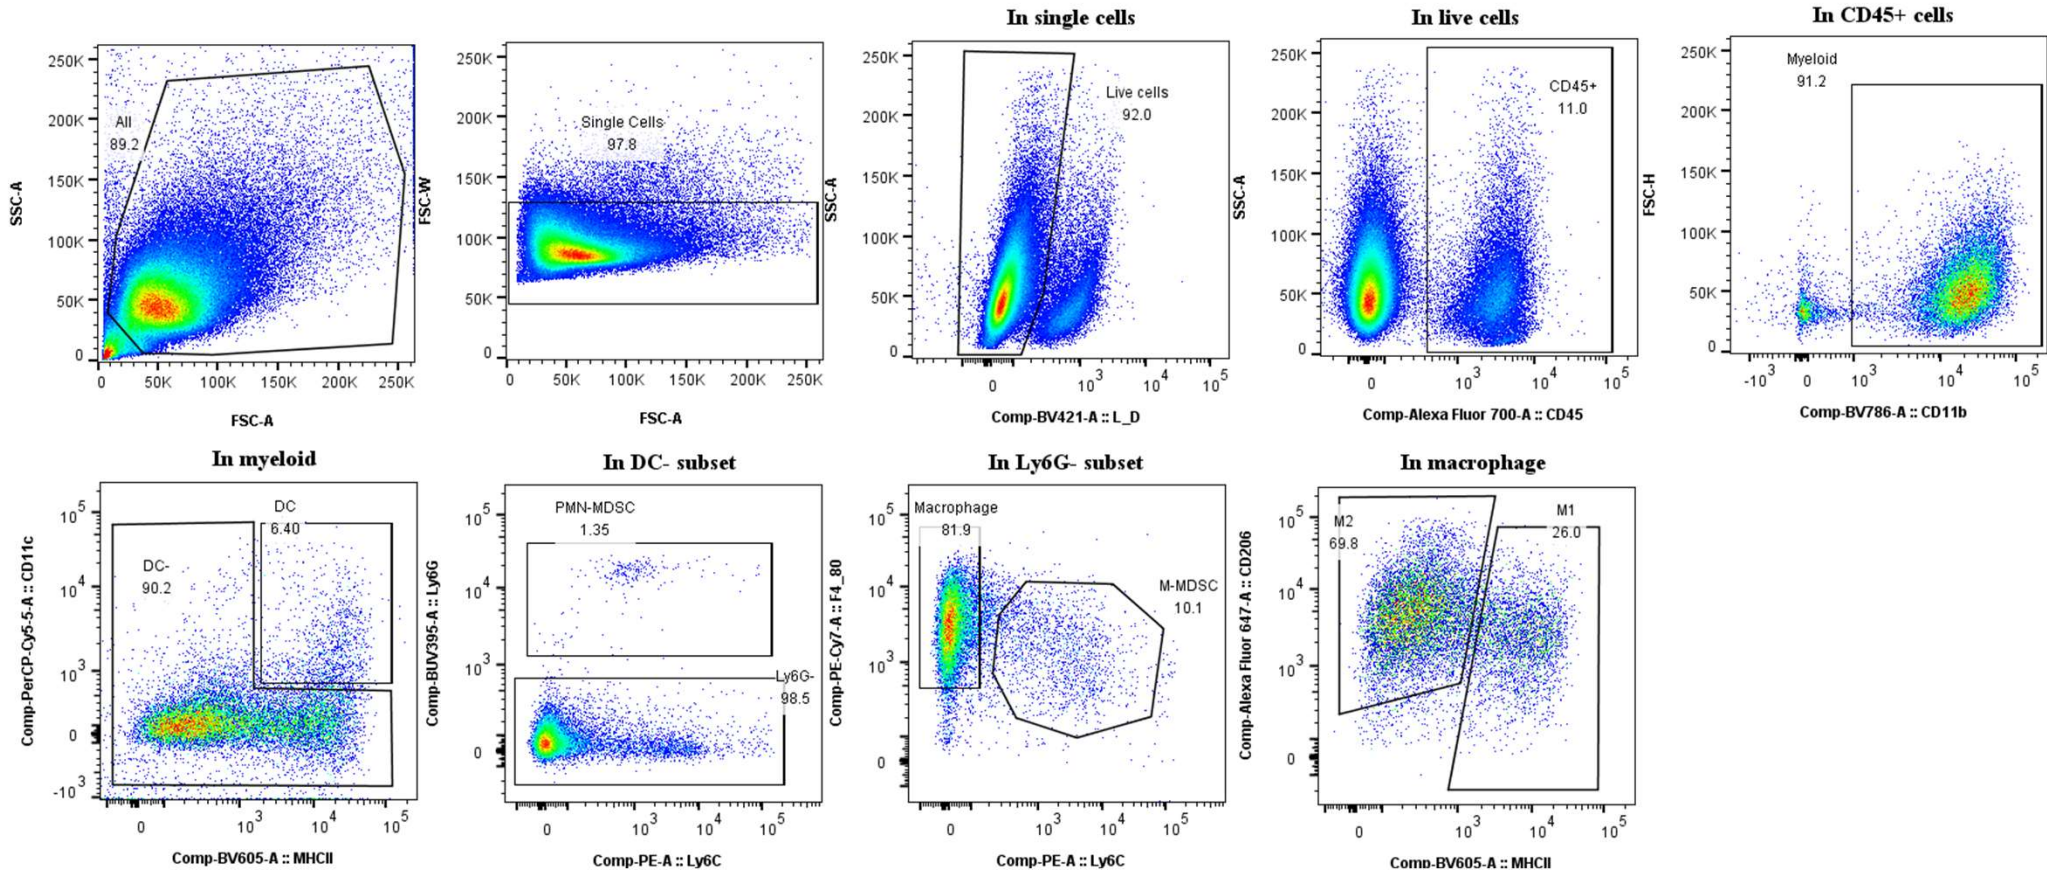

**Figure S2. Flow cytometry gating strategy for tumor-infiltrating immune cells analysis**

(A) Panel for lymphocytes and (B) panel for myeloid cells
