# Supplementary material for: Tumor-immune profiling of CT-26 and Colon 26 syngeneic mouse models reveals mechanism of anti-PD-1 response
Source: PubMed Central journal article supplement (PMC8590766; doi:10.1186/s12885-021-08974-3), 2021-11-13
Supplement: 12885_2021_8974_MOESM7_ESM.pdf [file 12885_2021_8974_MOESM7_ESM.pdf]

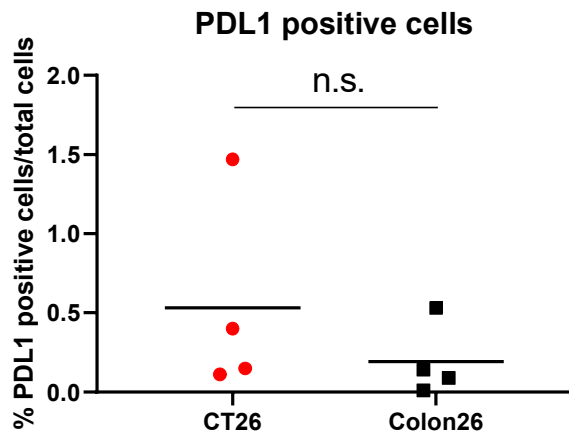

**Figure S7. No difference of PDL1 positive cells between CT-26 and Colon 26 tumor tissues.**

BALB/c mice were inoculated with  $3 \times 10^5$  CT-26 or Colon 26 cells. When the tumor volume reached approximately  $100 \text{ mm}^3$ , tumor tissues were harvested. Immunohistochemistry analysis was performed on fixed and paraffin embedded tumor samples. Means are indicated as bars. n.s., nonsignificant
